# Supplementary material for: Downregulated TNF-α Levels after Cryo-Thermal Therapy Drive Tregs Fragility to Promote Long-Term Antitumor Immunity
Source: MDPI journal article supplement (doi:10.3390/ijms22189951), 2021-09-15
Supplement: s1 [file s1]

## Supplementary materials

# Downregulated TNF- $\alpha$ levels after cryo-thermal therapy drive Tregs fragility to promote long-term antitumor immunity

Yue Lou <sup>1</sup>, Junjun Wang <sup>1</sup>, Peng Peng <sup>1</sup>, Shicheng Wang <sup>1</sup>, Ping Liu <sup>1,\*</sup> and Lisa X. Xu <sup>1,\*</sup>

<sup>1</sup> School of Biomedical Engineering and Med-X Research Institute, Shanghai Jiao Tong University, Shanghai, China

\* Correspondence: Lisa X. Xu: lisaxu@sjtu.edu.cn; Ping Liu: pingliu@sjtu.edu.cn

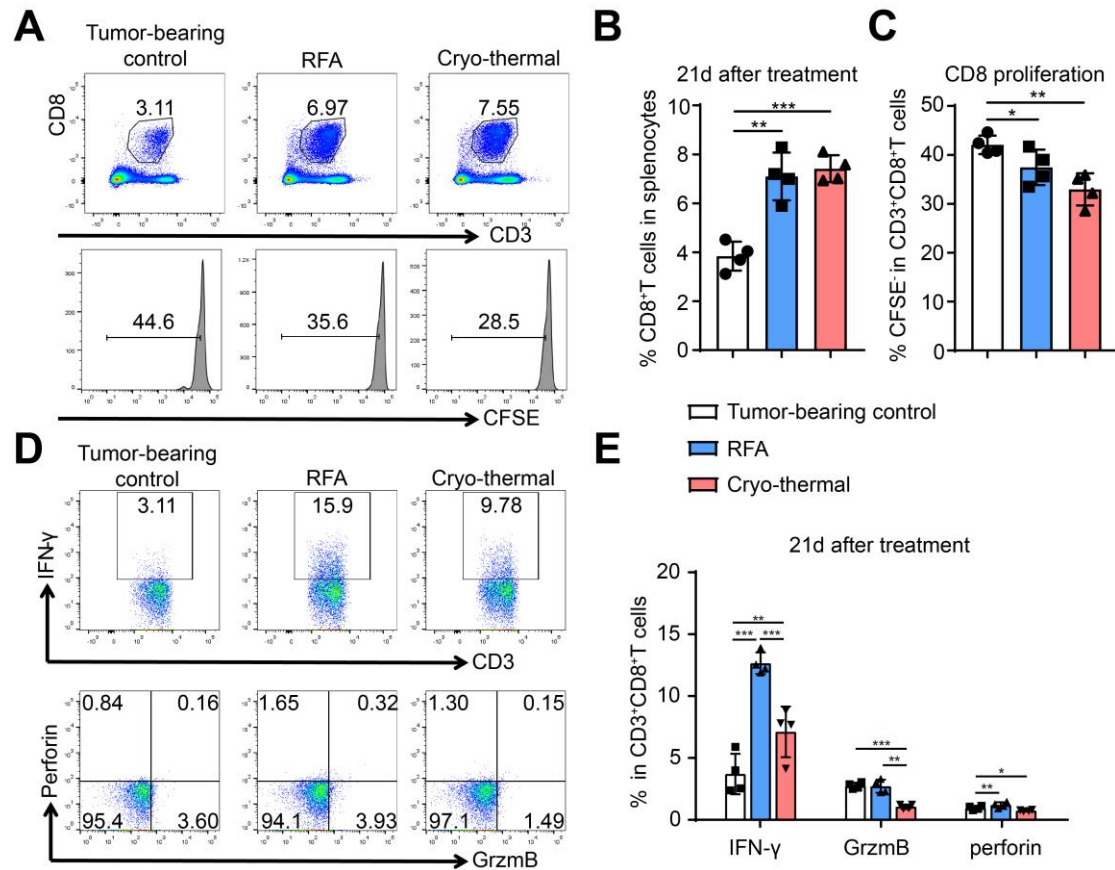

**Figure S1.** Cryo-thermal mediated antitumor immune response was not depended on CD8<sup>+</sup> T cells. (A-C) The percentages of CD8<sup>+</sup> T cells in splenic lymphocytes (B) and the proliferation (C) of CD8<sup>+</sup> T cells were detected by flow cytometry on day 21 after cryo-thermal therapy or RFA treatment. For CD8<sup>+</sup> T cells proliferation assay. Splenic CD8<sup>+</sup> T cells were isolated from tumor-bearing control (39 days after inoculation), RFA or cryo-thermal (21 days after treatment) treated mice by using microbeads. The CD8<sup>+</sup> T cells were labeled with CFSE and then cultured with  $\alpha$ CD3 (1 ng/mL) for 24h. CD8<sup>+</sup> T cell proliferation (CFSE-) were detected by flow cytometry. (D) The expression of IFN- $\gamma$ , Granzyme B and perforin in splenic CD8<sup>+</sup> T cells were detected by flow cytometry. \*P < 0.05, \*\*P < 0.01, \*\*\*P < 0.001. n = 4 for each group.

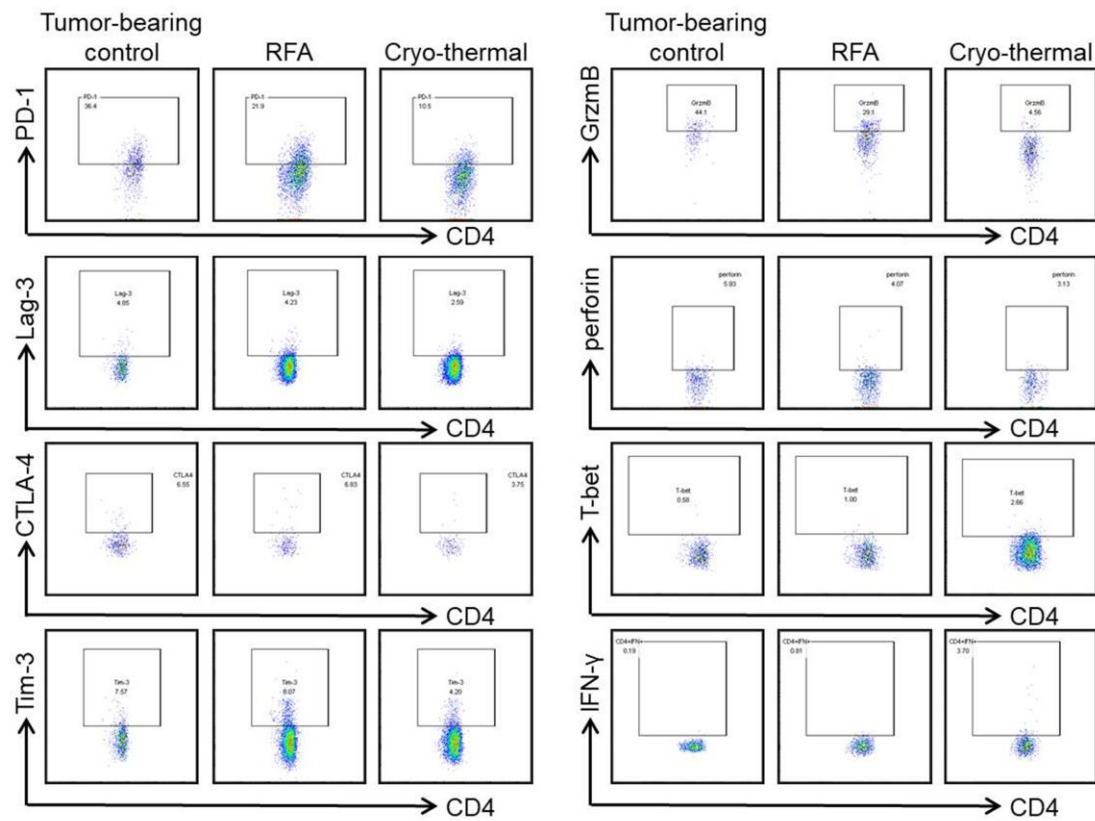

**Figure S2.** Cryo-thermal therapy drove the fragile phenotype of Tregs and down-regulated its suppressive function. Flow cytometry gating strategy for determination of PD-1, Lag-3, CTLA-4, Tim-3, Granzyme B, Perforin, T-bet and IFN-γ in Tregs. (Representative flow chart of Fig. 3).

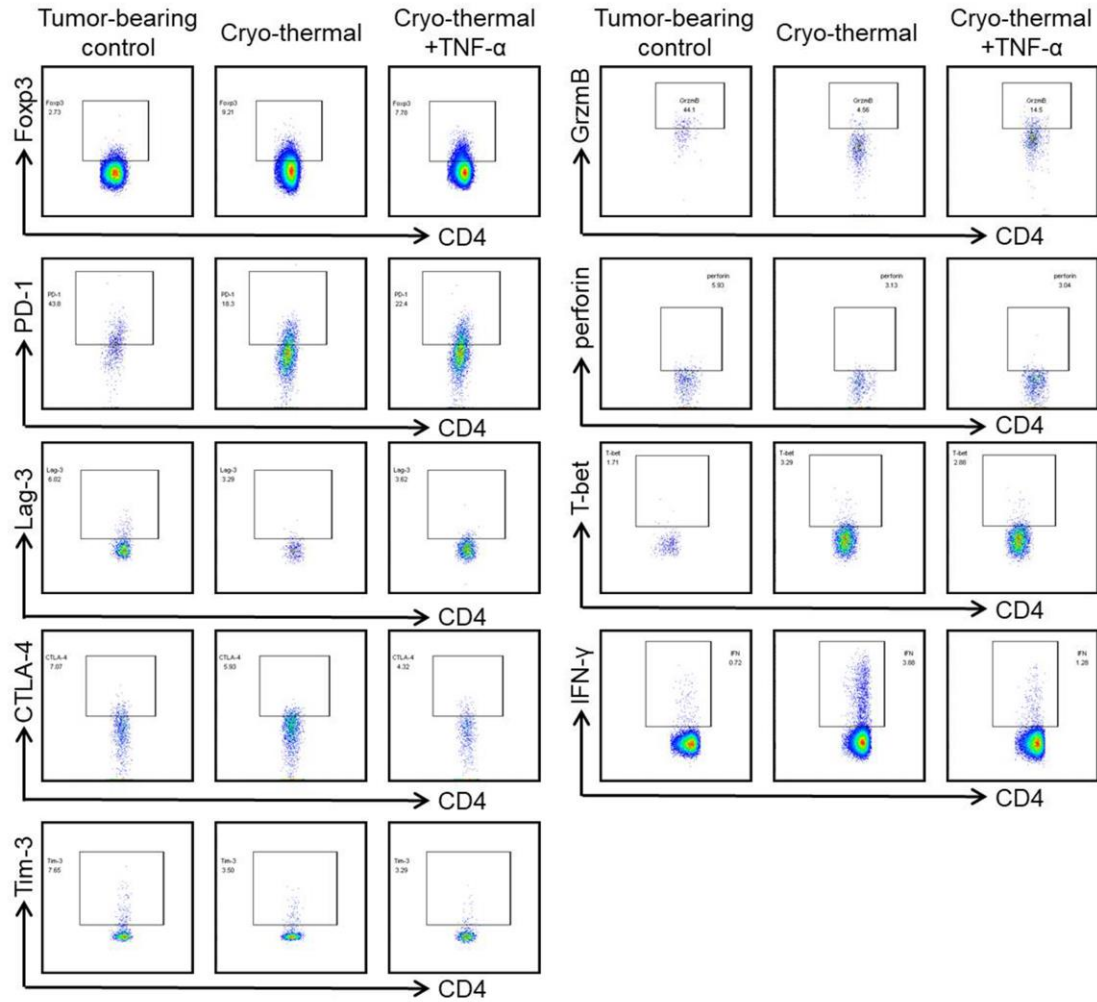

**Figure S3.** *In vivo* TNF- $\alpha$  supplement after cryo-thermal therapy damaged Tregs fragility and promoted tumor metastasis of mice. Flow cytometry gating strategy for determination of Tregs, and the expression of PD-1, Lag-3, CTLA-4, Tim-3, Granzyme B, Perforin, T-bet and IFN- $\gamma$  in Tregs. (Representative flow chart of Fig. 5).

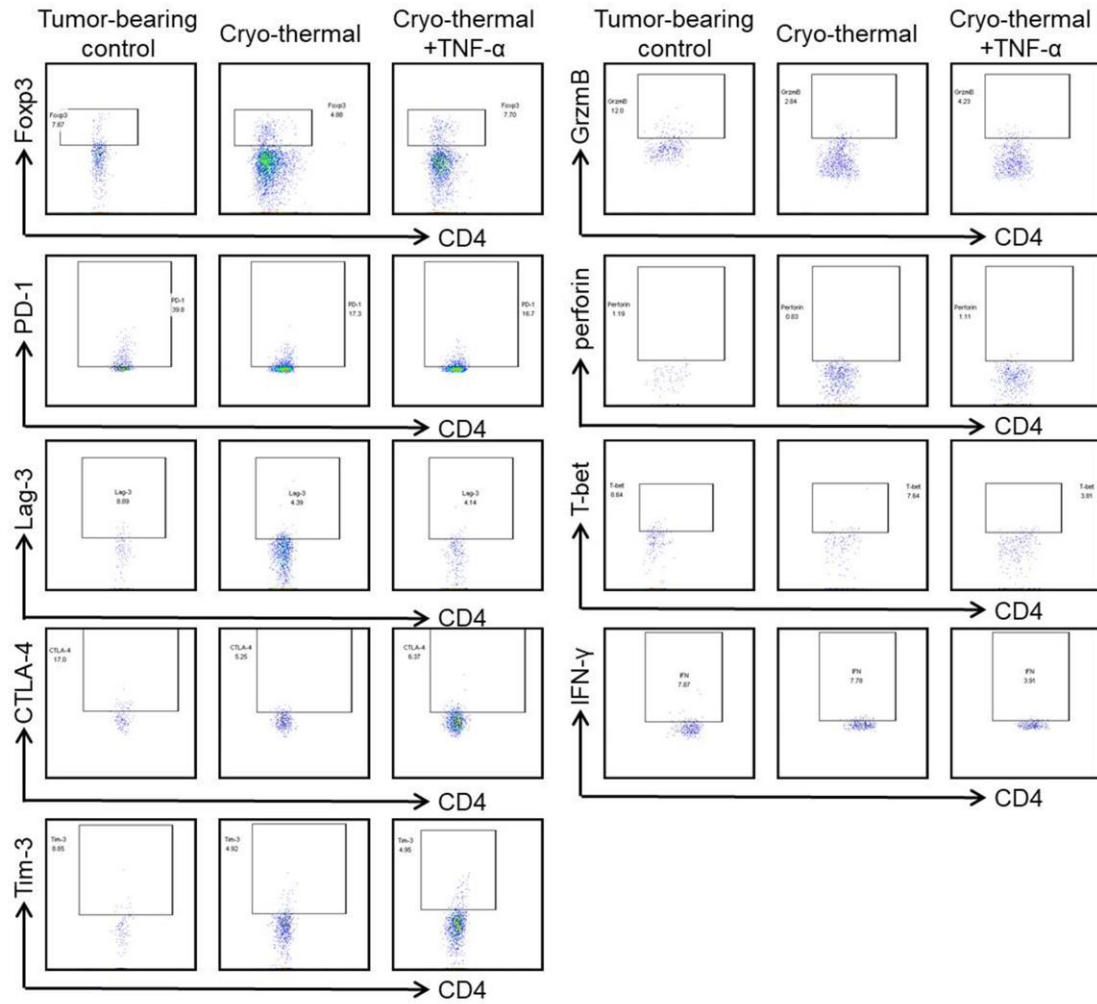

**Figure S4.** *In vivo* TNF- $\alpha$  supplement after cryo-thermal therapy damaged Tregs fragility and promoted tumor metastasis of mice. Flow cytometry gating strategy for determination of Tregs, and the expression of PD-1, Lag-3, CTLA-4, Tim-3, Granzyme B, Perforin, T-bet and IFN- $\gamma$  in Tregs. (Representative flow chart of Fig. 6).

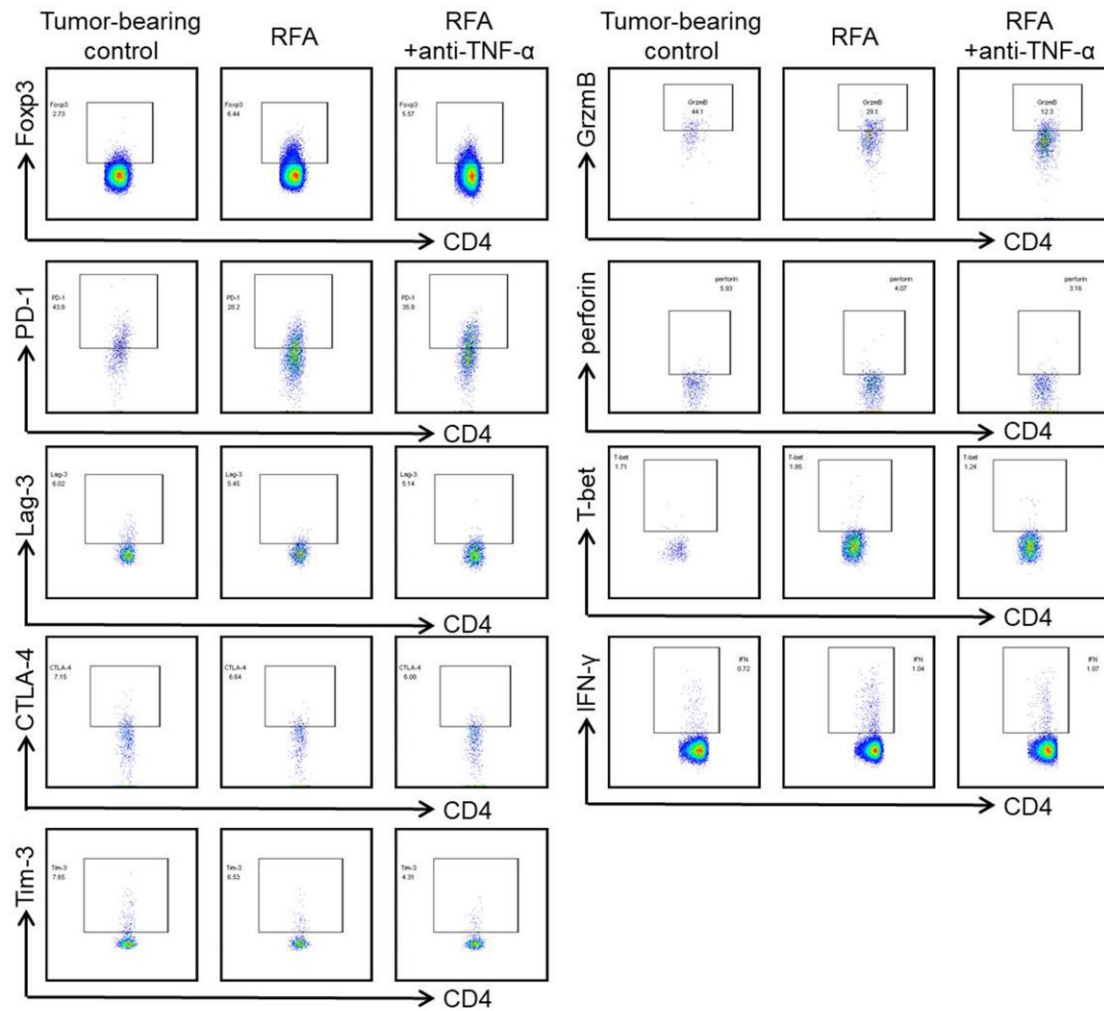

**Figure S5.** TNF- $\alpha$  neutralization after RFA treatment inhibited Treg function and suppressed tumor metastasis as well as promoted the long-term survival of mice. Flow cytometry gating strategy for determination of Tregs, and the expression of PD-1, Lag-3, CTLA-4, Tim-3, Granzyme B, Perforin, T-bet and IFN- $\gamma$  in Tregs. (Representative flow chart of Fig. 7).

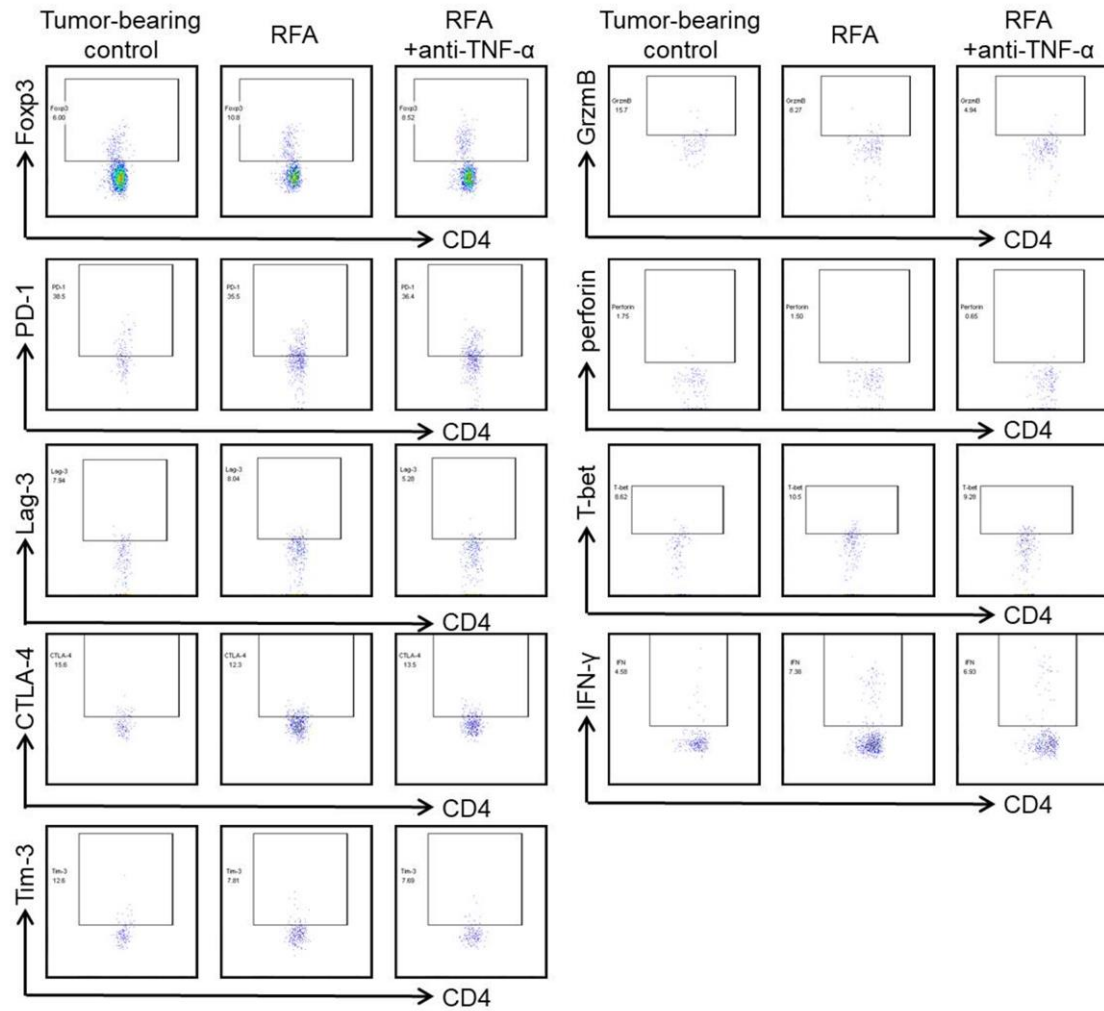

**Figure S6.** TNF- $\alpha$  neutralization after RFA treatment inhibited Treg function and suppressed tumor metastasis as well as promoted the long-term survival of mice. Flow cytometry gating strategy for determination of Tregs, and the expression of PD-1, Lag-3, CTLA-4, Tim-3, Granzyme B, Perforin, T-bet and IFN- $\gamma$  in Tregs. (Representative flow chart of Fig. 8).
